# Supplementary material for: The stomatal CO2 proxy does not saturate at high atmospheric CO2 concentrations: evidence from stomatal index responses of Araucariaceae conifers
Source: Springer Nature journal article supplement (doi:10.1007/s00442-011-1969-1), 2011-04-02
Supplement: MOESM1 [file 442_2011_1969_MOESM1_ESM.doc]

# Supplementary Data Table 1: Sensitivity testing of stomatal index values of Araucariaceae species against [CO2] values at 0, 5, 10 and 20 years from date of collection of herbarium specimen to test potential effect of leaf lifespan on SI-[CO2] relationship . Values indicate P-value from regression analysis.

| **Species** | **0 Years** | **5 Years** | **10 Years** | **20 Years** |
| --- | --- | --- | --- | --- |
| **Araucaria bidwilli** | 0.266 | 0.712 | 0.768 | 0.818 |
| **Araucaria angustifolia** | 0.731 | 0.364 | 0.356 | 0.416 |
| **Araucaria columnaris** | 0.068 | 0.604 | 0.667 | 0.686 |
| **Araucaria heterophylla** | 0.942 | 0.158 | 0.382 | 0.644 |
| **Agathis australis** | 0.820 | 0.313 | 0.618 | 0.841 |

Regression: [CO2] (0, 5, 10 and 20 Years) Vs SD, SI, SNL
